# Supplementary material for: Structural control of self-healing silica–poly(tetrahydropyran)–poly(ε-caprolactone) hybrids
Source: Royal Society of Chemistry journal article supplement (doi:10.1039/d1tb00555c), 2021-01-01
Supplement: d1tb00555c1.pdf [file d1tb00555c1.pdf]

## Electronic Supplementary Information

### Structural Control of Self-Healing Silica-Poly(Tetrahydropyran)-Poly( $\epsilon$ -caprolactone) Hybrids

Wei Fan<sup>1</sup>, Randall E. Youngman<sup>2</sup>, Xiangting Ren<sup>1</sup>, Donghong Yu<sup>1,\*</sup>, Morten M. Smedskjaer<sup>1,\*</sup>

<sup>1</sup> *Department of Chemistry and Bioscience, Aalborg University, 9220 Aalborg, Denmark*

<sup>2</sup> *Science and Technology Division, Corning Incorporated, Corning, New York 14831, USA*

\* *Corresponding authors. email: [yu@bio.aau.dk](mailto:yu@bio.aau.dk) (D.Y.), [mos@bio.aau.dk](mailto:mos@bio.aau.dk) (M.M.S.)*

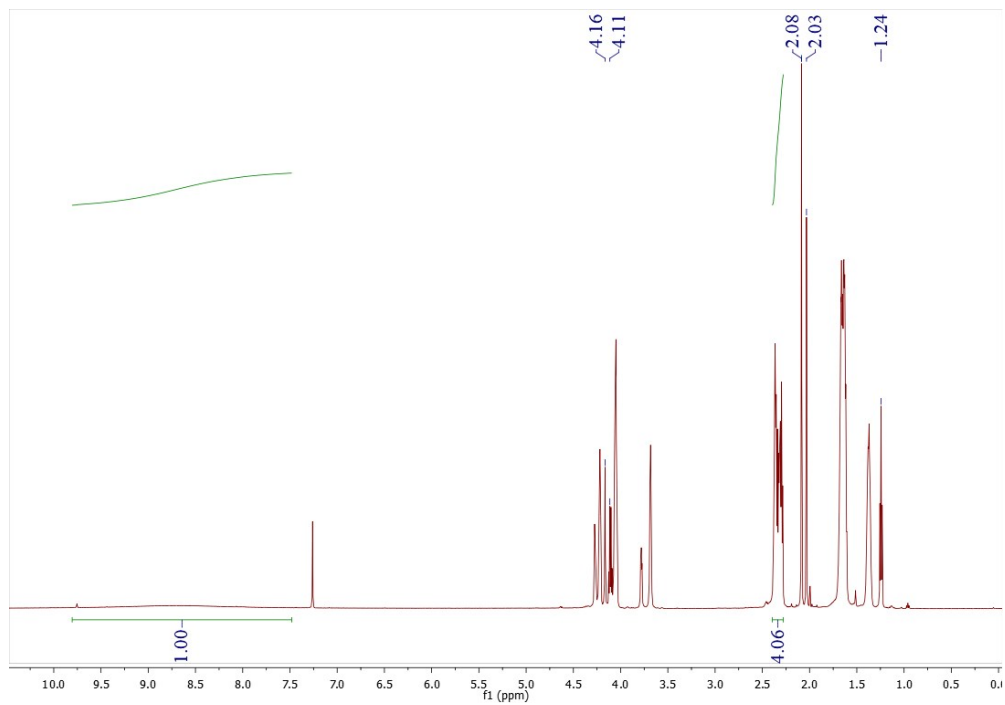

**Fig. S1** <sup>1</sup>H-NMR spectrum of HOOC-PCL-COOH in CDCl<sub>3</sub>.

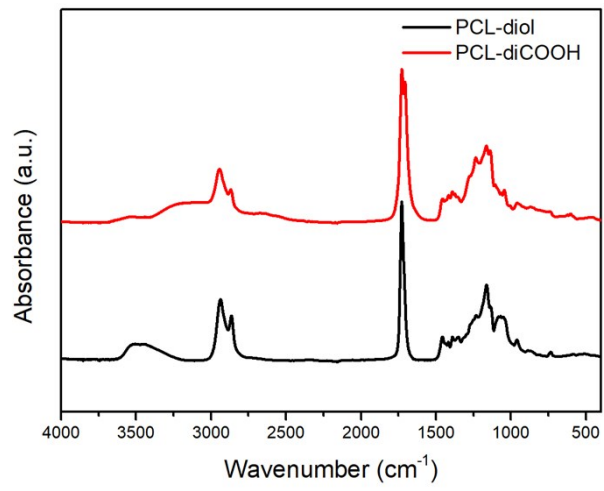

**Fig. S2** FT-IR spectra HO-PCL-OH and HOOC-PCL-COOH.

(a) Step 1

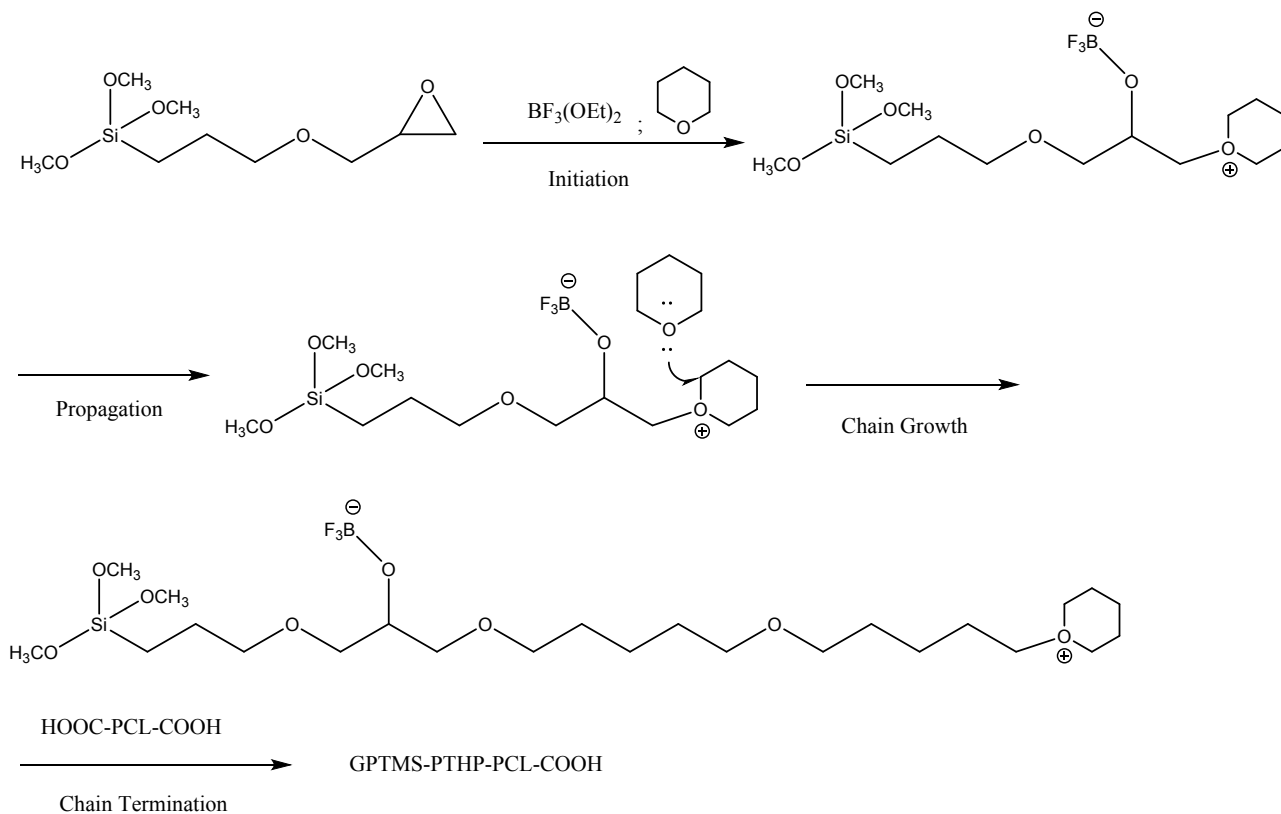

(b) Step 2

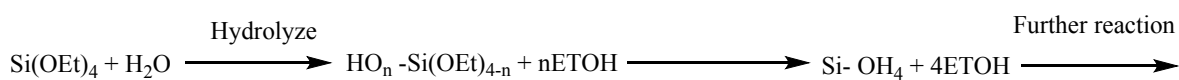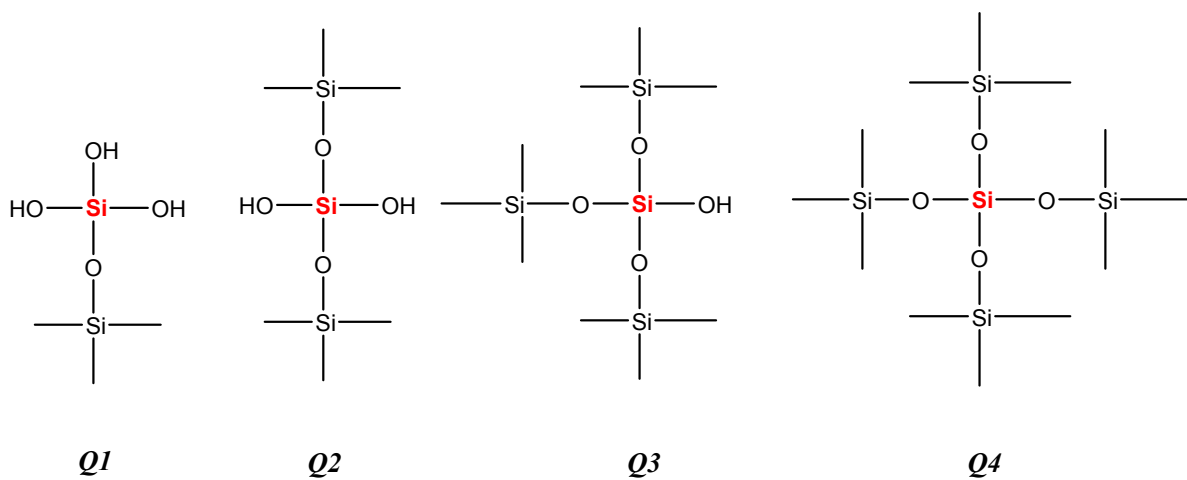

Fig. S3 Reaction mechanism of (a) THP cationic ring-opening polymerization; (b) hydrolysis of TEOS.

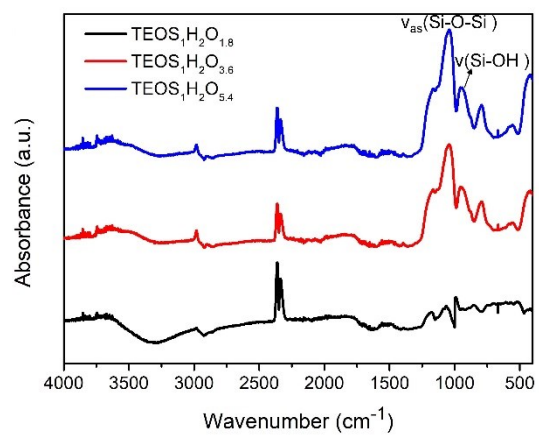

**Fig. S4** Molecular structures of pure inorganic bulks compared through FTIR.

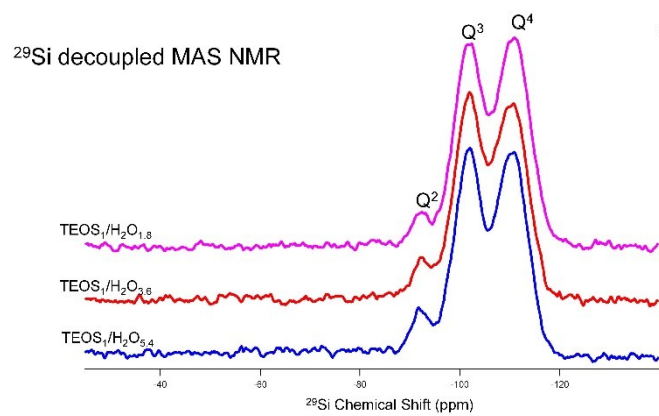

**Fig. S5**  $^{29}\text{Si}$  NMR spectra of inorganic bulks in different TEOS/ $\text{H}_2\text{O}$  molar ratios.

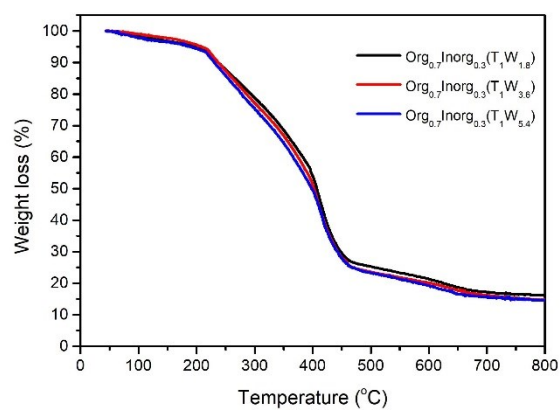

**Fig. S6** TGA of hybrids with the same organic/inorganic compositions  $\text{Org}_{0.7}\text{Inorg}_{0.3}$  with different silica structures.

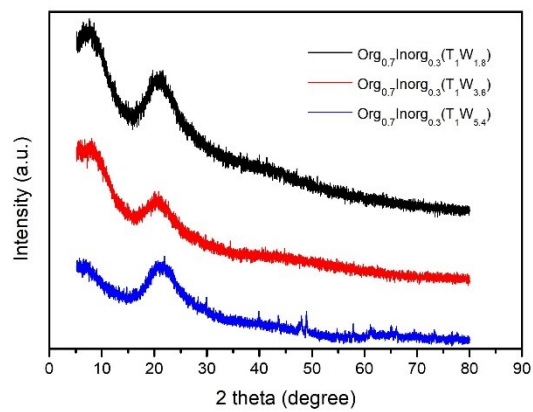

**Fig. S7** XRD of hybrids with the same organic/inorganic compositions but different silica structures.



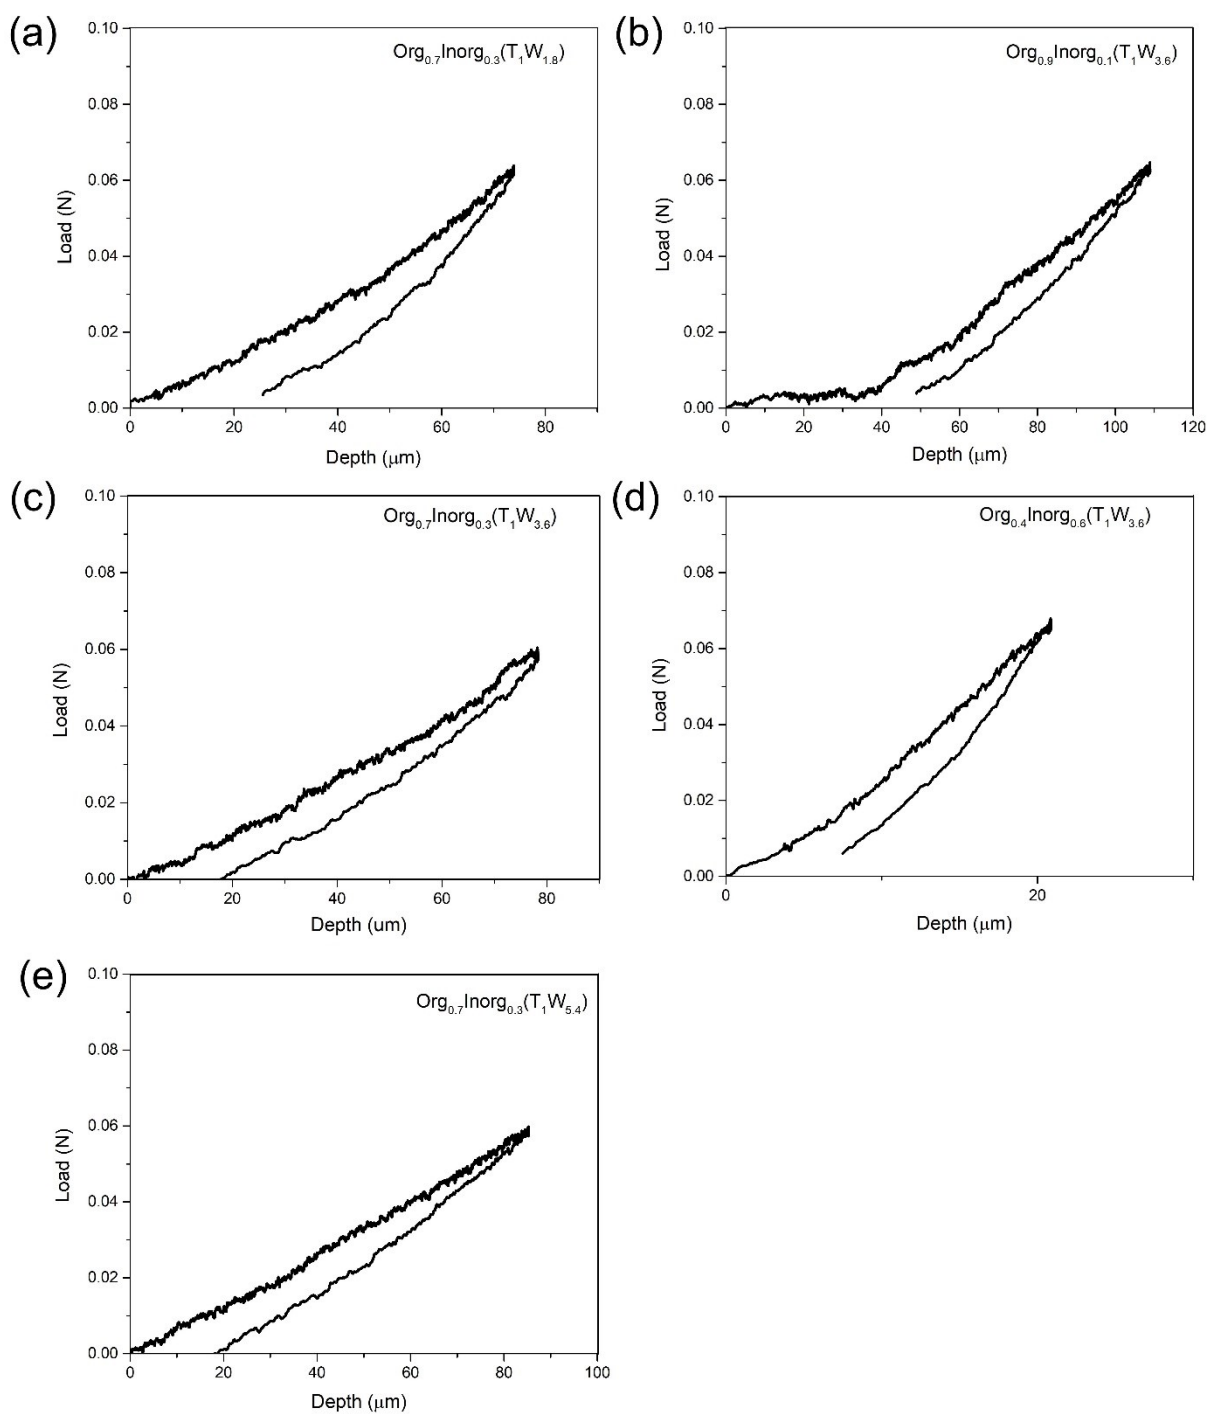

**Fig. S8** Load-depth curves for the loading-unloading of the five hybrids as measured by micro-indentation.

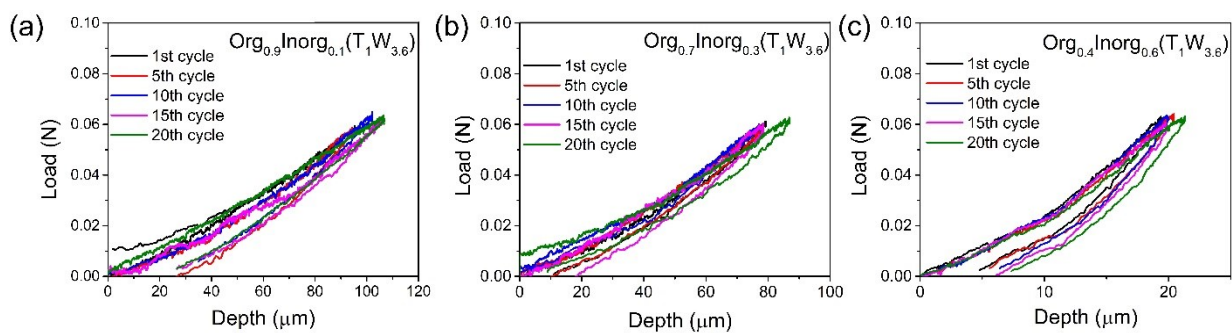

**Figure S9.** Indentation loading-unloading experiment of hybrids with different I/O ratios ( $\text{Org}_{0.9}\text{Inorg}_{0.1}(\text{T}_1\text{W}_{3.6})$ ;  $\text{Org}_{0.7}\text{Inorg}_{0.3}(\text{T}_1\text{W}_{3.6})$ ;  $\text{Org}_{0.4}\text{Inorg}_{0.6}(\text{T}_1\text{W}_{3.6})$ ) for up to 20 cycles.

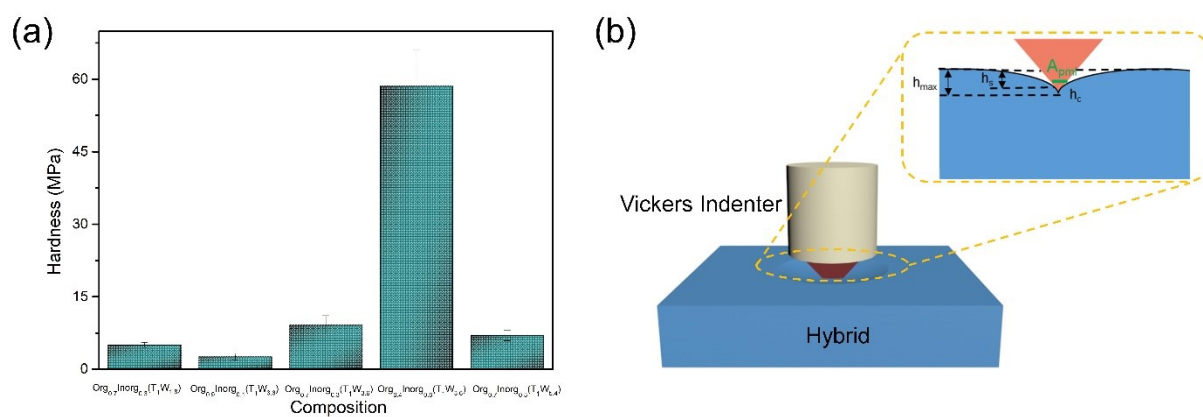

**Fig. S10** (a) The hardness of five hybrids tested by micro-indentation method; (b) Elasto-plastic deformation of hybrids at the maximum load.

Org<sub>0.9</sub>Inorg<sub>0.1</sub>(T<sub>1</sub>W<sub>3.6</sub>)

Org<sub>0.9</sub>Inorg<sub>0.1</sub>(T<sub>1</sub>W<sub>5.4</sub>)

Crack

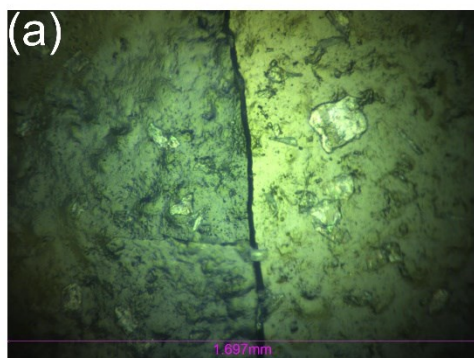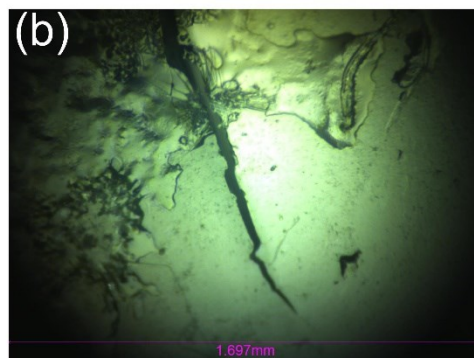

Recover

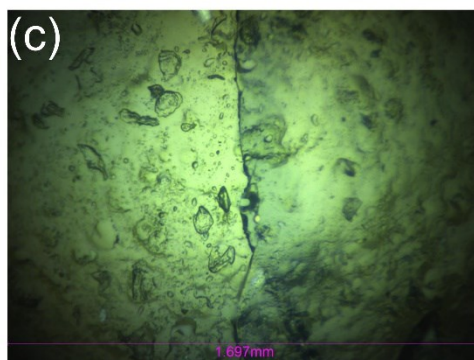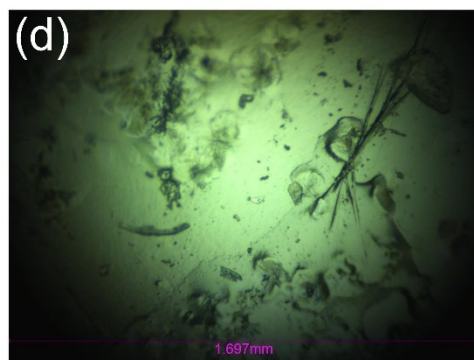

**Fig. S11** Optical microscope images of four hybrid compositions after creation of a defect (top view): (a) Org<sub>0.9</sub>Inorg<sub>0.1</sub>(T<sub>1</sub>W<sub>3.6</sub>); (b) Org<sub>0.9</sub>Inorg<sub>0.1</sub>(T<sub>1</sub>W<sub>5.4</sub>). After self-healing for 24 hours: (c) Org<sub>0.9</sub>Inorg<sub>0.1</sub>(T<sub>1</sub>W<sub>3.6</sub>); (d) Org<sub>0.9</sub>Inorg<sub>0.1</sub>(T<sub>1</sub>W<sub>5.4</sub>).

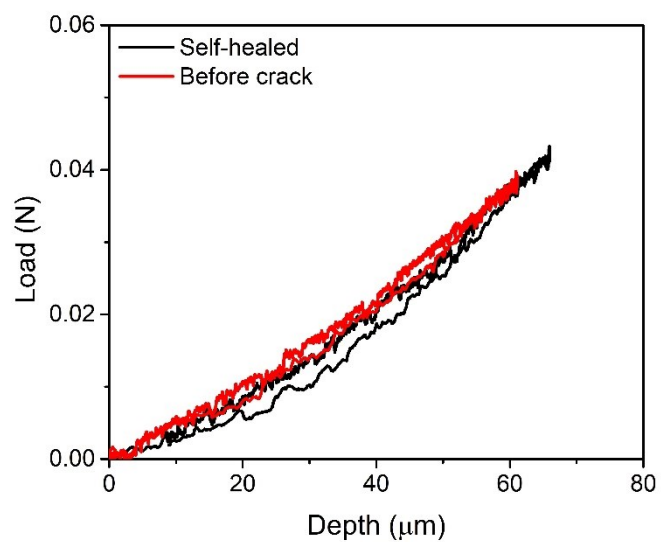

**Fig. S12** Indentation test of hybrid  $\text{Org}_{0.9}\text{Inorg}_{0.1}(\text{T}_1\text{W}_{1.8})$  before the induced crack (fresh samples) and after cracking and self-healing.

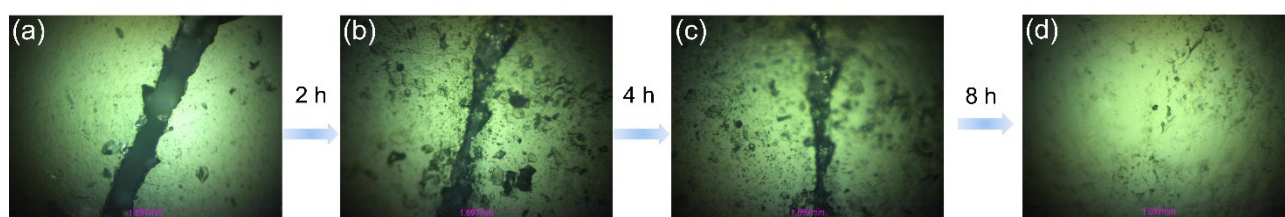

**Fig. S13** Monitoring self-healing ability of hybrid  $\text{Org}_{0.9}\text{Inorg}_{0.1}(\text{T}_1\text{W}_{1.8})$  at 37 °C.

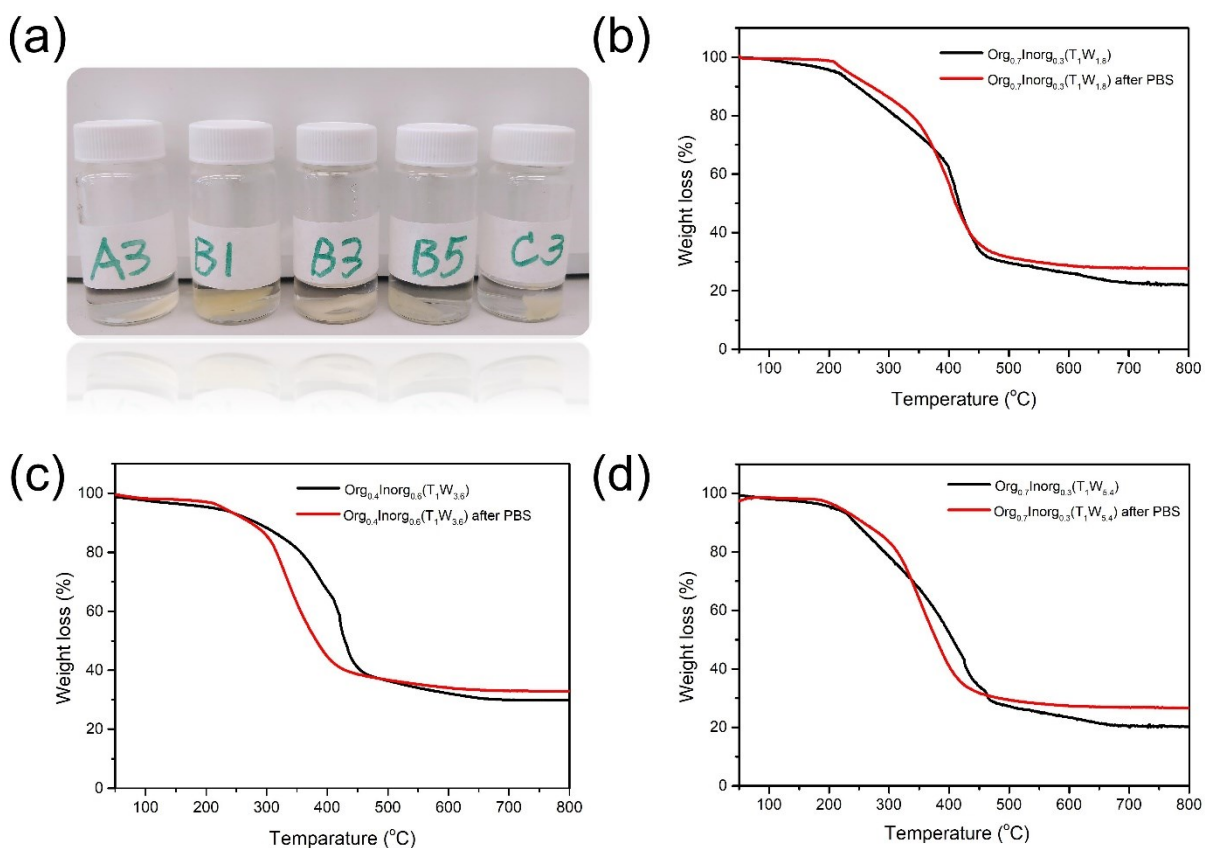

**Fig. S14** (a) Pictures of hybrids after immersion (A3-C3 represent hybrids  $\text{Org}_{0.7}\text{Inorg}_{0.3}(\text{T}_1\text{W}_{1.8})$ ; (b)  $\text{Org}_{0.9}\text{Inorg}_{0.1}(\text{T}_1\text{W}_{3.6})$ ;  $\text{Org}_{0.7}\text{Inorg}_{0.3}(\text{T}_1\text{W}_{3.6})$ ;  $\text{Org}_{0.4}\text{Inorg}_{0.6}(\text{T}_1\text{W}_{3.6})$ ; and  $\text{Org}_{0.7}\text{Inorg}_{0.3}(\text{T}_1\text{W}_{5.4})$ , respectively); TGA curves of hybrids (b)  $\text{Org}_{0.7}\text{Inorg}_{0.3}(\text{T}_1\text{W}_{1.8})$ ; (c)  $\text{Org}_{0.4}\text{Inorg}_{0.6}(\text{T}_1\text{W}_{3.6})$ ; (d)  $\text{Org}_{0.7}\text{Inorg}_{0.3}(\text{T}_1\text{W}_{5.4})$  before and after immersed in PBS solution.

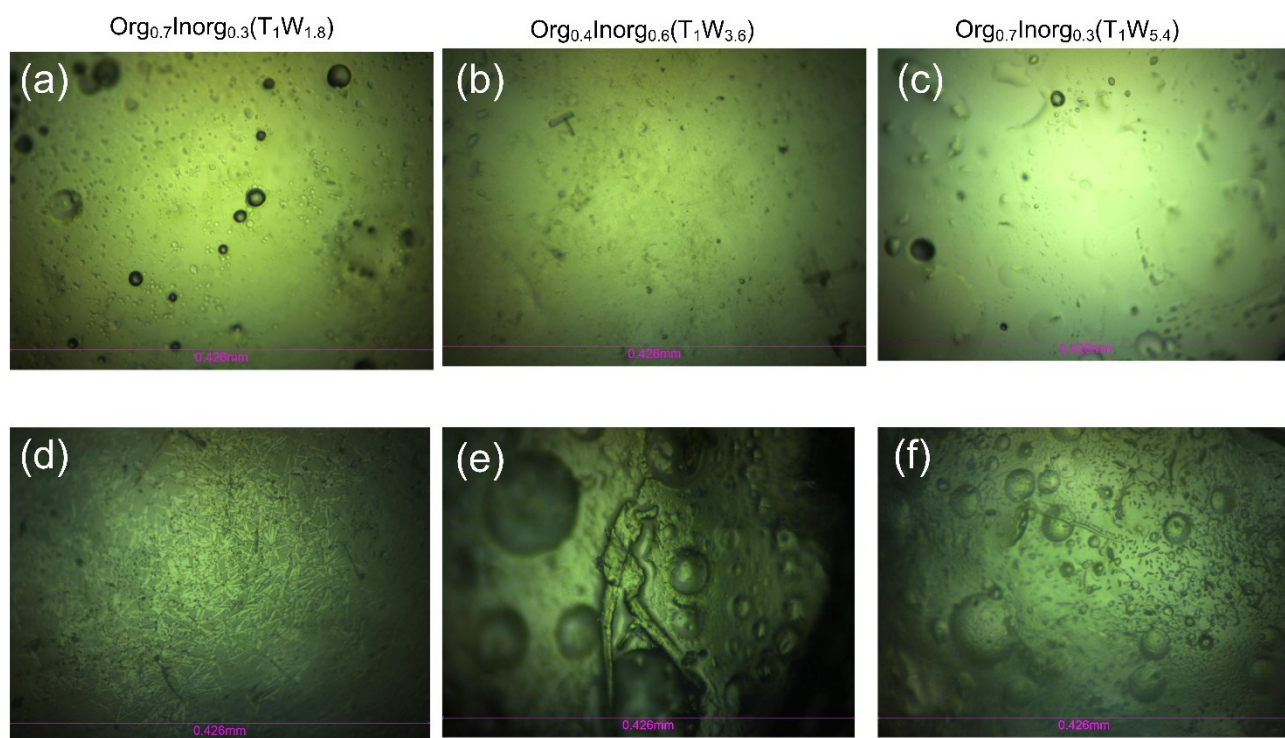

**Fig. S15** Optical microscope images of hybrids before immersed in PBS (a)  $\text{Org}_{0.7}\text{Inorg}_{0.3}(\text{T}_1\text{W}_{1.8})$ ; (b)  $\text{Org}_{0.4}\text{Inorg}_{0.6}(\text{T}_1\text{W}_{3.6})$ ; (c)  $\text{Org}_{0.7}\text{Inorg}_{0.3}(\text{T}_1\text{W}_{5.4})$ ; after immersed in PBS (d)  $\text{Org}_{0.7}\text{Inorg}_{0.3}(\text{T}_1\text{W}_{1.8})$ ; (e)  $\text{Org}_{0.4}\text{Inorg}_{0.6}(\text{T}_1\text{W}_{3.6})$ ; (f)  $\text{Org}_{0.7}\text{Inorg}_{0.3}(\text{T}_1\text{W}_{5.4})$ .



**Table S1.** Compositions of different hybrids.

| Types                                                                      | TEOS (mol) | H <sub>2</sub> O (mol) | TEOS (wt %) | PCL-diCOOH (wt%) |
|----------------------------------------------------------------------------|------------|------------------------|-------------|------------------|
| Org <sub>0.9</sub> Inorg <sub>0.1</sub> (T <sub>1</sub> W <sub>1.8</sub> ) | 1          | 1.8                    | 10          | 90               |
| Org <sub>0.8</sub> Inorg <sub>0.2</sub> (T <sub>1</sub> W <sub>1.8</sub> ) | 1          | 1.8                    | 20          | 80               |
| Org <sub>0.7</sub> Inorg <sub>0.3</sub> (T <sub>1</sub> W <sub>1.8</sub> ) | 1          | 1.8                    | 30          | 70               |
| Org <sub>0.6</sub> Inorg <sub>0.4</sub> (T <sub>1</sub> W <sub>1.8</sub> ) | 1          | 1.8                    | 40          | 60               |
| Org <sub>0.4</sub> Inorg <sub>0.6</sub> (T <sub>1</sub> W <sub>1.8</sub> ) | 1          | 1.8                    | 60          | 40               |
| Org <sub>0.9</sub> Inorg <sub>0.1</sub> (T <sub>1</sub> W <sub>3.6</sub> ) | 1          | 3.6                    | 10          | 90               |
| Org <sub>0.8</sub> Inorg <sub>0.2</sub> (T <sub>1</sub> W <sub>3.6</sub> ) | 1          | 3.6                    | 20          | 80               |
| Org <sub>0.7</sub> Inorg <sub>0.3</sub> (T <sub>1</sub> W <sub>3.6</sub> ) | 1          | 3.6                    | 30          | 70               |
| Org <sub>0.6</sub> Inorg <sub>0.4</sub> (T <sub>1</sub> W <sub>3.6</sub> ) | 1          | 3.6                    | 40          | 60               |
| Org <sub>0.4</sub> Inorg <sub>0.6</sub> (T <sub>1</sub> W <sub>3.6</sub> ) | 1          | 3.6                    | 60          | 40               |
| Org <sub>0.9</sub> Inorg <sub>0.1</sub> (T <sub>1</sub> W <sub>5.4</sub> ) | 1          | 5.4                    | 10          | 90               |
| Org <sub>0.8</sub> Inorg <sub>0.2</sub> (T <sub>1</sub> W <sub>5.4</sub> ) | 1          | 5.4                    | 20          | 80               |
| Org <sub>0.7</sub> Inorg <sub>0.3</sub> (T <sub>1</sub> W <sub>5.4</sub> ) | 1          | 5.4                    | 30          | 70               |
| Org <sub>0.6</sub> Inorg <sub>0.4</sub> (T <sub>1</sub> W <sub>5.4</sub> ) | 1          | 5.4                    | 40          | 60               |
| Org <sub>0.4</sub> Inorg <sub>0.6</sub> (T <sub>1</sub> W <sub>5.4</sub> ) | 1          | 5.4                    | 60          | 40               |
